# Supplementary material for: Inhibition mechanisms of hemoglobin, immunoglobulin G, and whole blood in digital and real-time PCR
Source: PubMed Central journal article supplement (PMC5857286; doi:10.1007/s00216-018-0931-z), 2018-03-05
Supplement: 216_2018_931_MOESM1_ESM.pdf [file 216_2018_931_MOESM1_ESM.pdf]

## **Analytical and Bioanalytical Chemistry**

### **Electronic Supplementary Material**

#### **Inhibition mechanisms of hemoglobin, immunoglobulin G and whole blood in digital and real-time PCR**

Maja Sidstedt, Johannes Hedman, Erica L. Romsos, Leticia Waitara, Lars Wadsö,  
Carolyn R. Steffen, Peter M. Vallone, Peter Rådström

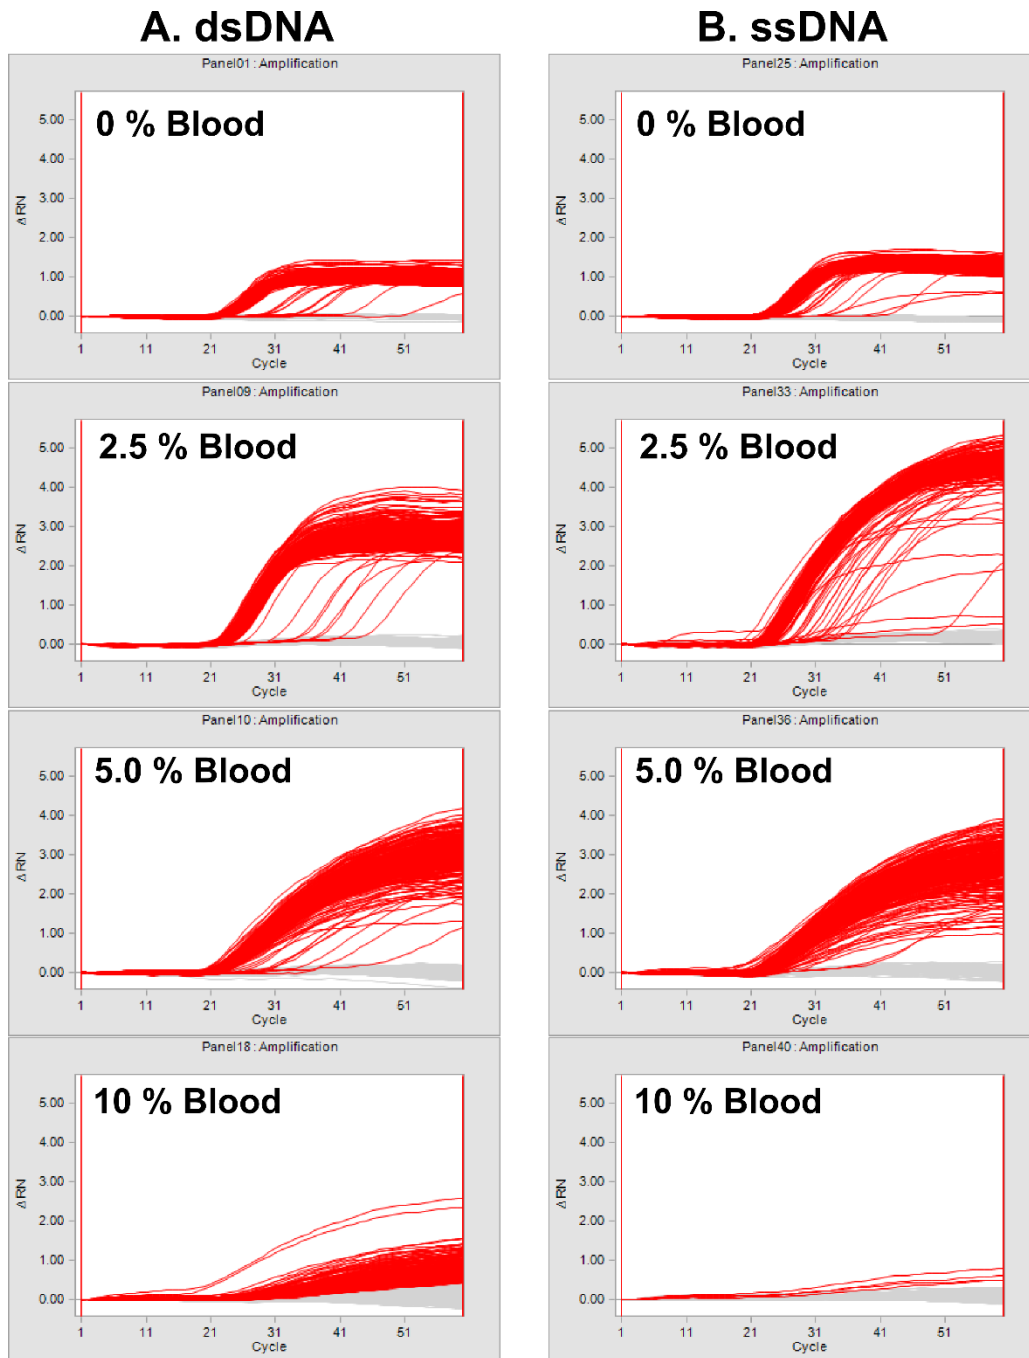

**Fig. S1** Digital PCR results with different amounts of whole blood added to the reactions. An assay targeting the *rb1* gene of human DNA was applied with 50 ng DNA added. Examples of dPCR amplification curves with (A) dsDNA or (B) ssDNA as starting template

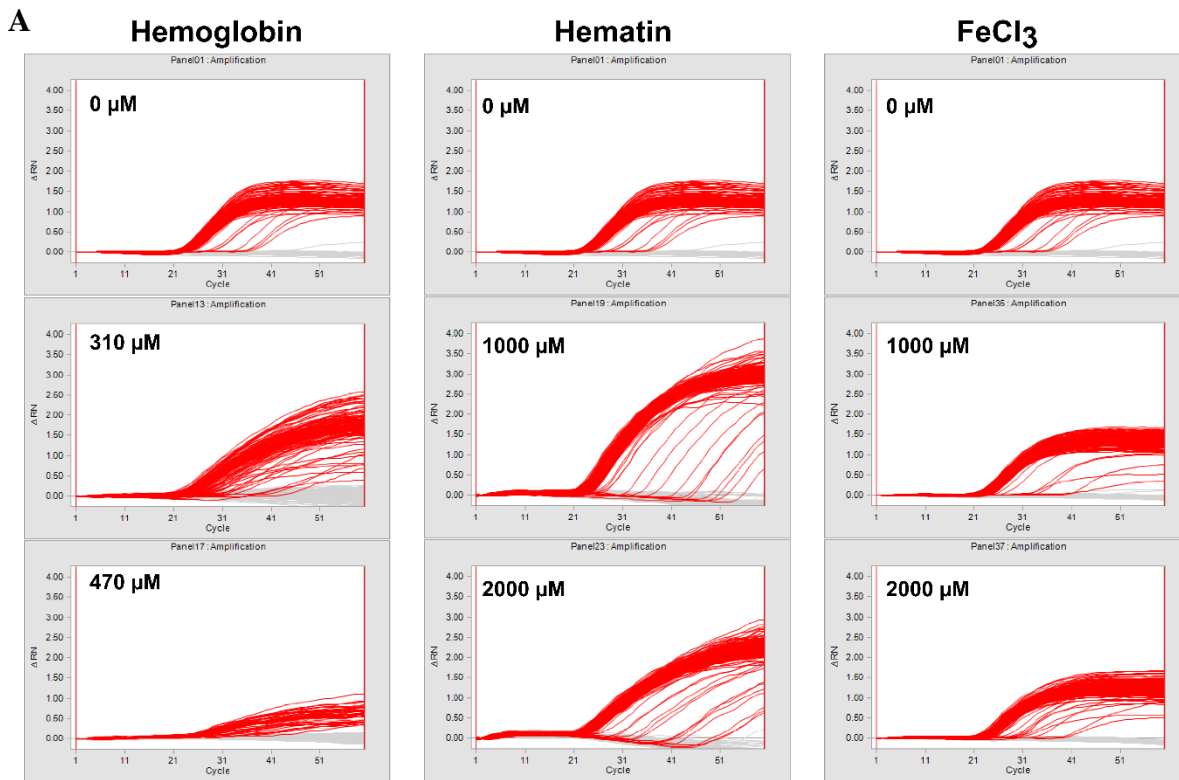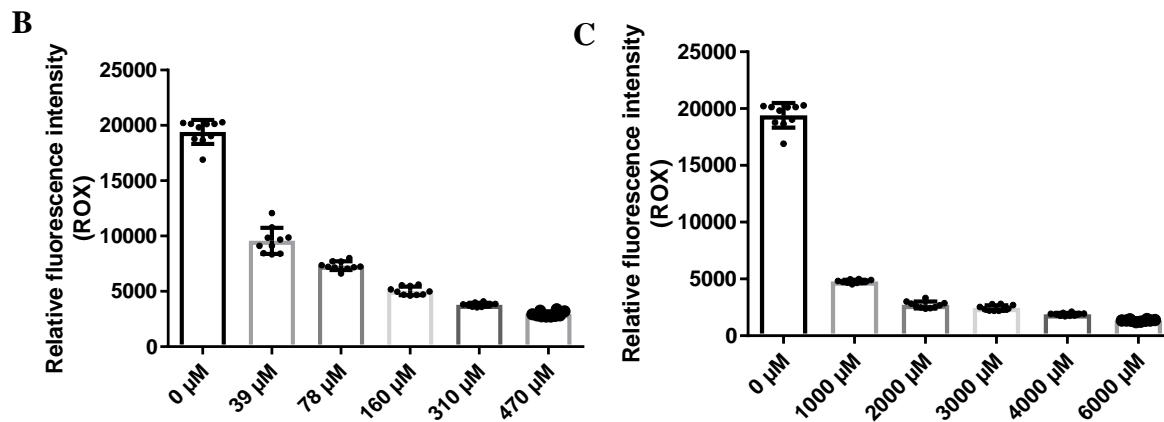

**Fig. S2** (A) Example of amplification curves in presence of hemoglobin, hematin or iron trichloride in dPCR using the assay targeting the *rb1* gene of human DNA with 50 ng DNA added. (B) ROX intensity with relative fluorescence intensity means (n=10) for 0 μM to 470 μM hemoglobin and (C) 0 μM to 6000 μM hematin

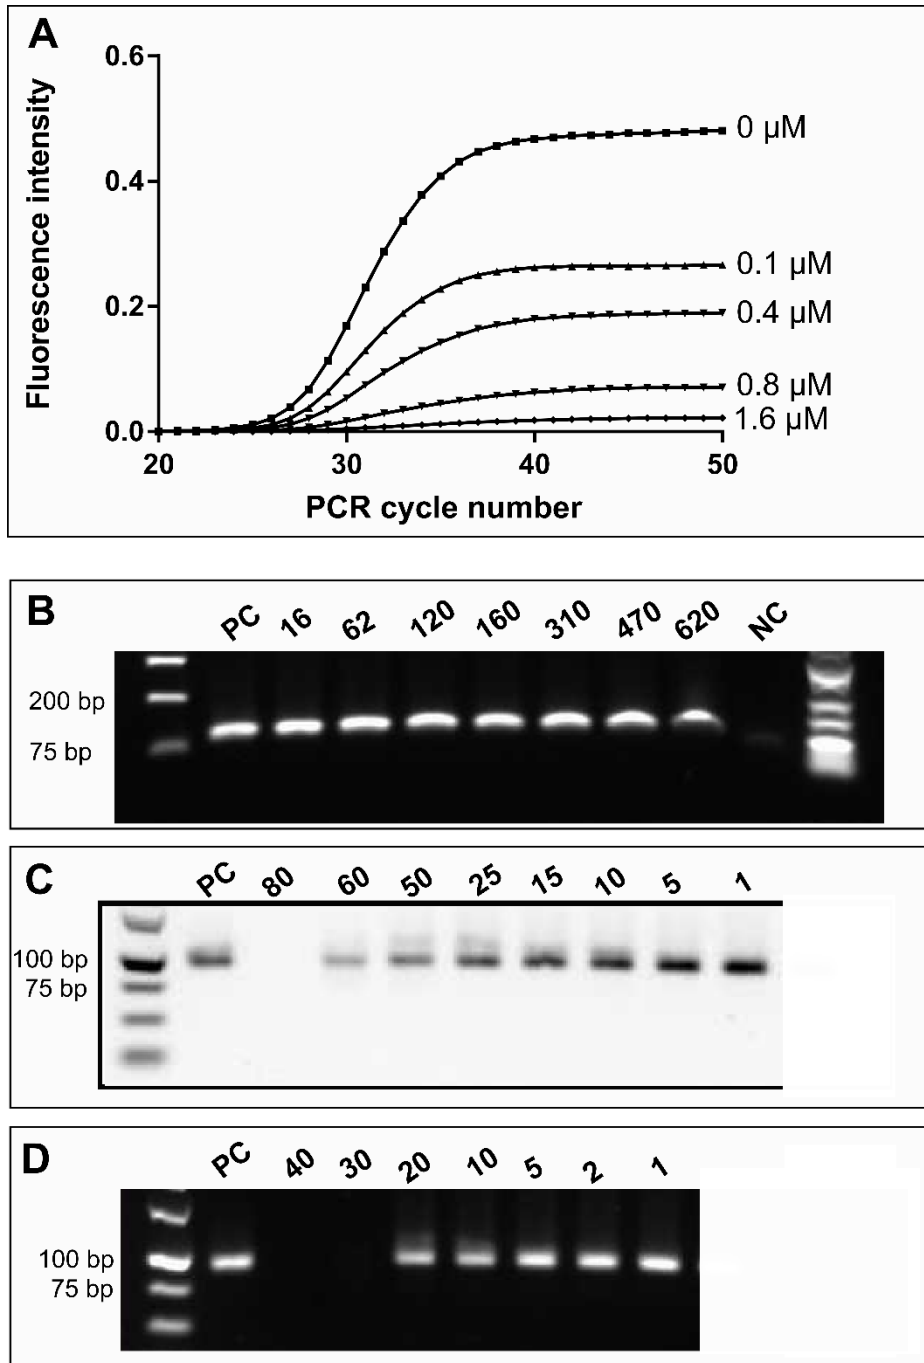

**Fig. S3** EvaGreen qPCR results when the assay targeting the *invA* gene of *S. Tm*. And 0.052 ng DNA added with (A) 0  $\mu\text{M}$  to 1.6  $\mu\text{M}$  hemoglobin, and gel electrophoresis of PCR products for (B) 0  $\mu\text{M}$  to 620  $\mu\text{M}$  hemoglobin, (C) 0  $\mu\text{M}$  to 80  $\mu\text{M}$  hematin and (D) 0  $\mu\text{M}$  to 40  $\mu\text{M}$  iron trichloride. PC denotes sample without inhibitor and values the concentration ( $\mu\text{M}$ ) of each inhibitor

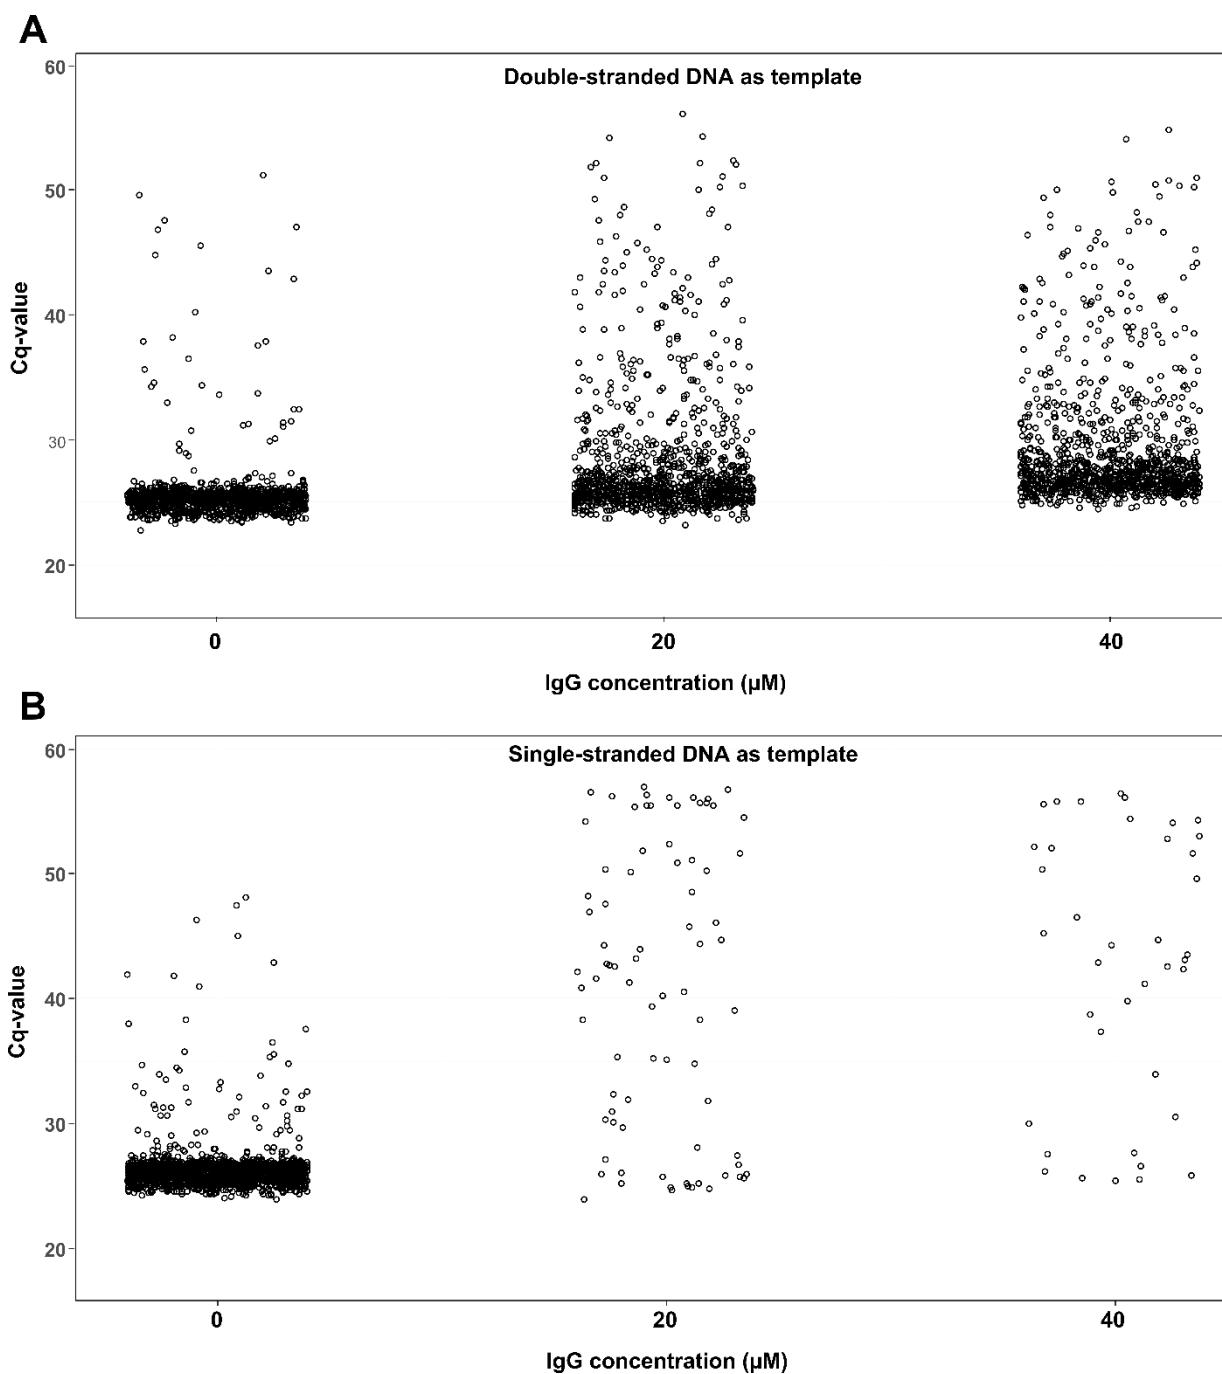

**Fig. S4** IgG-induced inhibition in dPCR with (A) dsDNA or (B) ssDNA as starting template. An assay targeting the *rb1* gene of human DNA with 50 ng DNA added was applied. The Cq values for each positive reaction of three panels are shown for each IgG concentration, each circle representing one positive reaction

**Table S1** IgG-induced inhibition in dPCR when using dsDNA versus ssDNA as template for the *InvA* assay in dPCR. An assay targeting the *invA* gene of *S. Tm* with 60 pg DNA added was applied with 0  $\mu$ M, 27  $\mu$ M or 53  $\mu$ M of IgG. Results are shown as the means and standard deviations of three replicates

| <b>IgG amount (<math>\mu</math>M)</b> |                                 | <b>0</b>         | <b>27</b>        | <b>53</b>         |
|---------------------------------------|---------------------------------|------------------|------------------|-------------------|
| <b>dsDNA</b>                          | Positive reactions              | 333 $\pm$ 8      | 269 $\pm$ 8      | 265 $\pm$ 10      |
|                                       | DNA concentration (ng/ $\mu$ L) | 38.28 $\pm$ 1.15 | 28.70 $\pm$ 1.01 | 28.13 $\pm$ 1.25  |
|                                       | Cq value                        | 26.15 $\pm$ 2.34 | 28.59 $\pm$ 3.83 | 30.94 $\pm$ 5.04  |
|                                       | Amplification efficiency        | 1.44 $\pm$ 0.05  | 1.33 $\pm$ 0.09  | 1.27 $\pm$ 0.10   |
| <b>ssDNA</b>                          | Positive reactions              | 456 $\pm$ 9      | 26 $\pm$ 5       | 26 $\pm$ 5        |
|                                       | DNA concentration (ng/ $\mu$ L) | 59.27 $\pm$ 2.64 | 2.29 $\pm$ 0.41  | 2.26 $\pm$ 0.41   |
|                                       | Cq value                        | 27.20 $\pm$ 1.48 | 38.93 $\pm$ 9.63 | 36.45 $\pm$ 11.20 |
|                                       | Amplification efficiency        | 1.41 $\pm$ 0.06  | 1.38 $\pm$ 0.23  | 1.26 $\pm$ 0.18   |

**Table S2** IgG-induced inhibition in dPCR with (A) dsDNA or (B) ssDNA as starting template. An assay targeting the *rb1* gene of human DNA with 50 ng DNA added was applied. Results are shown as the means and standard deviations of three replicates

| <b>IgG amount (<math>\mu</math>M)</b> |                                 | <b>0</b>         | <b>20</b>         | <b>40</b>         |
|---------------------------------------|---------------------------------|------------------|-------------------|-------------------|
| <b>IgG with dsDNA</b>                 | Positive reactions              | 405 $\pm$ 17     | 348 $\pm$ 13      | 356 $\pm$ 6       |
|                                       | DNA concentration (ng/ $\mu$ L) | 32 $\pm$ 2       | 26 $\pm$ 1        | 27 $\pm$ 1        |
|                                       | Cq value                        | 25.55 $\pm$ 2.33 | 28.29 $\pm$ 5.28  | 29.15 $\pm$ 4.92  |
|                                       | Amplification efficiency        | 1.75 $\pm$ 0.20  | 1.88 $\pm$ 0.34   | 1.80 $\pm$ 0.27   |
| <b>IgG with ssDNA</b>                 | Positive reactions              | 537 $\pm$ 9      | 30 $\pm$ 5        | 13 $\pm$ 4        |
|                                       | DNA concentration (ng/ $\mu$ L) | 51 $\pm$ 2       | 2 $\pm$ 0         | 1 $\pm$ 0         |
|                                       | Cq value                        | 26.36 $\pm$ 1.86 | 40.80 $\pm$ 11.46 | 42.63 $\pm$ 10.84 |
|                                       | Amplification efficiency        | 1.71 $\pm$ 0.14  | 1.94 $\pm$ 0.39   | 1.64 $\pm$ 0.24   |

**Table S3** Amplification with ssDNA as template in presence of hemoglobin, hematin or iron trichloride. Digital PCR results with the assay targeting the *rb1* gene of human DNA was applied with 50 ng DNA added. Results are shown as the means and standard deviations of three replicates

|                         |                                        |                  |                  |                  |
|-------------------------|----------------------------------------|------------------|------------------|------------------|
| <b>Hemoglobin</b>       | Amount ( $\mu\text{M}$ )               | <b>0</b>         | <b>160</b>       | <b>310</b>       |
|                         | Positive reactions                     | 506 $\pm$ 25     | 330 $\pm$ 7      | 198 $\pm$ 8      |
|                         | DNA concentration (ng/ $\mu\text{L}$ ) | 46.0 $\pm$ 4.2   | 24.0 $\pm$ 0.7   | 12.8 $\pm$ 0.6   |
|                         | Cq value                               | 26.12 $\pm$ 1.70 | 24.77 $\pm$ 2.15 | 23.85 $\pm$ 2.59 |
|                         | Amplification efficiency               | 1.78 $\pm$ 0.15  | 2.07 $\pm$ 0.26  | 1.77 $\pm$ 0.21  |
| <b>Hematin</b>          | Amount ( $\mu\text{M}$ )               | <b>0</b>         | <b>2000</b>      | <b>3000</b>      |
|                         | Positive reactions                     | 506 $\pm$ 25     | 504 $\pm$ 8      | 113 $\pm$ 39     |
|                         | DNA concentration (ng/ $\mu\text{L}$ ) | 46.0 $\pm$ 4.2   | 45.5 $\pm$ 1.2   | 6.9 $\pm$ 2.6    |
|                         | Cq value                               | 26.12 $\pm$ 1.70 | 24.02 $\pm$ 1.04 | 51.68 $\pm$ 7.41 |
|                         | Amplification efficiency               | 1.78 $\pm$ 0.15  | 1.64 $\pm$ 0.09  | 1.06 $\pm$ 0.10  |
| <b>FeCl<sub>3</sub></b> | Amount ( $\mu\text{M}$ )               | <b>0</b>         | <b>2000</b>      | <b>4000</b>      |
|                         | Positive reactions                     | 506 $\pm$ 25     | 494 $\pm$ 8      | 217 $\pm$ 5      |
|                         | DNA concentration (ng/ $\mu\text{L}$ ) | 46.0 $\pm$ 4.2   | 43.9 $\pm$ 1.3   | 14.2 $\pm$ 0.4   |
|                         | Cq value                               | 26.12 $\pm$ 1.70 | 25.02 $\pm$ 1.43 | 27.22 $\pm$ 5.65 |
|                         | Amplification efficiency               | 1.78 $\pm$ 0.15  | 2.06 $\pm$ 0.22  | 1.29 $\pm$ 0.04  |

**Table S4** Summary of dPCR results when starting with ssDNA as template and reactions in presence of whole blood. An assay targeting the *rb1* gene of human DNA was applied with 50 ng DNA added and results are shown as the means and standard deviations of three replicates. NA – not applicable

| <b>Blood amount<br/>% (v/v)</b> | <b>Positive<br/>reactions</b> | <b>Cq value</b> | <b>Amplification<br/>efficiency</b> |
|---------------------------------|-------------------------------|-----------------|-------------------------------------|
| 0%                              | 567 ± 8                       | 26.23 ± 1.57    | 1.85 ± 0.16                         |
| 2.5%                            | 567 ± 14                      | 23.70 ± 1.49    | 1.69 ± 0.20                         |
| 5.0%                            | 576 ± 12                      | 23.28 ± 1.38    | 1.47 ± 0.25                         |
| 7.5%                            | 542 ± 84                      | 26.26 ± 1.56    | 1.09 ± 0.07                         |
| 10%                             | 9 ± 9                         | NA              | NA                                  |
| 15%                             | 3 ± 3                         | NA              | NA                                  |
| only 5% blood                   | 165 ± 8                       | 23.38 ± 1.52    | 1.41 ± 0.16                         |



**Table S5** dPCR results with 5U DNA polymerase in presence of hemoglobin, hematin or iron trichloride. An assay targeting the *rb1* gene of human DNA was applied with 50 ng DNA added and results are shown as the means and standard deviations of three replicates

|                         |                                        |                  |                  |                  |
|-------------------------|----------------------------------------|------------------|------------------|------------------|
| <b>Hemoglobin</b>       | Amount ( $\mu\text{M}$ )               | <b>0</b>         | <b>310</b>       | <b>470</b>       |
|                         | Positive reactions                     | 399 $\pm$ 10     | 250 $\pm$ 4      | 160 $\pm$ 17     |
|                         | DNA concentration (ng/ $\mu\text{L}$ ) | 31.4 $\pm$ 1.2   | 16.8 $\pm$ 0.3   | 10.0 $\pm$ 1.2   |
|                         | Cq value                               | 24.61 $\pm$ 0.91 | 26.44 $\pm$ 2.12 | 26.60 $\pm$ 2.86 |
|                         | Amplification efficiency               | 2.16 $\pm$ 0.18  | 1.56 $\pm$ 0.18  | 1.36 $\pm$ 0.13  |
| <b>Hematin</b>          | Amount ( $\mu\text{M}$ )               | <b>0</b>         | <b>2000</b>      | <b>3000</b>      |
|                         | Positive reactions                     | 399 $\pm$ 10     | 404 $\pm$ 10     | 389 $\pm$ 8      |
|                         | DNA concentration (ng/ $\mu\text{L}$ ) | 31.4 $\pm$ 1.2   | 31.9 $\pm$ 1.1   | 30.2 $\pm$ 0.9   |
|                         | Cq value                               | 24.61 $\pm$ 0.91 | 26.43 $\pm$ 1.82 | 24.74 $\pm$ 1.25 |
|                         | Amplification efficiency               | 2.16 $\pm$ 0.18  | 1.45 $\pm$ 0.11  | 1.36 $\pm$ 0.11  |
| <b>FeCl<sub>3</sub></b> | Amount ( $\mu\text{M}$ )               | <b>0</b>         | <b>3000</b>      | <b>4000</b>      |
|                         | Positive reactions                     | 399 $\pm$ 10     | 413 $\pm$ 53     | 347 $\pm$ 18     |
|                         | DNA concentration (ng/ $\mu\text{L}$ ) | 31.4 $\pm$ 1.2   | 33.3 $\pm$ 6.7   | 25.7 $\pm$ 1.8   |
|                         | Cq value                               | 24.61 $\pm$ 0.91 | 25.96 $\pm$ 0.80 | 29.53 $\pm$ 3.22 |
|                         | Amplification efficiency               | 2.16 $\pm$ 0.18  | 1.56 $\pm$ 0.09  | 1.55 $\pm$ 0.19  |
